# Supplementary material for: Transcriptomic Profiling of Human Limbus-Derived Stromal/Mesenchymal Stem Cells—Novel Mechanistic Insights into the Pathways Involved in Corneal Wound Healing
Source: MDPI journal article supplement (doi:10.3390/ijms23158226), 2022-07-26
Supplement: s1 [file s1]

## Supplementary Materials

Supplementary Table S1: Antibodies used in Immunostaining

| Reagent or Resource                    | Source          | Catalogue # |
|----------------------------------------|-----------------|-------------|
| Rabbit polyclonal anti-PAX6            | Abcam           | ab5790      |
| Mouse monoclonal anti-CD90 (Thy-1)     | Santa Cruz      | SC-59396    |
| Mouse monoclonal anti-CD105 (Endoglin) | Santa Cruz      | SC 376381   |
| Mouse monoclonal anti-Vimentin         | Santa Cruz      | SC 6260     |
| Mouse Monoclonal anti-ABCG2            | Abcam           | ab3380      |
| Goat polyclonal anti-ABCB5             | Santa Cruz      | SC-104019   |
| Rabbit polyclonal anti-p63- $\alpha$   | Cell Signalling | #4892       |
| Mouse monoclonal anti-E-Cadherin       | Abcam           | ab1416      |
| Mouse monoclonal anti-N-Cadherin       | Santa Cruz      | SC-393933   |

Supplementary Table S2: Primer sequences used in in qRT-PCR

| Gene      | Primer Sequences          |                           |
|-----------|---------------------------|---------------------------|
|           | Forward (5' to 3')        | Reverse (5' to 3')        |
| ABCB5     | CCAAATCGGGGGCTGCGCATCTGTT | AGCCGCTGCTCCCCACAAATGCTA  |
| ABCG2     | GGGTTCTCTTCTCCTGACGACC    | TGGTTGTGAGATTGACCAACAGACC |
| CD105     | CGGTGGTCAATATCCTGTCGAG    | AGGAAGTGTGGGCTGAGGTAGA    |
| CD90      | CGCTCTCCTGCTAACAGTCTT     | CAGGCTGAACTCGTACTGGA      |
| COL1A1    | GTCACCCACCGACCAAGAAACC    | AAGTCCAGGCTGTCCAGGGATG    |
| COL3A1    | TGAAAGGACACAGAGGCTTCG     | GCACCATTCTTACCAGGCTC      |
| COL5A1    | CGCTCTCCCGTCTTCTCTC       | CACCCTCAAACACCTCCTCA      |
| CXCR4     | GATCAGCATCGACTCCTTCA      | GGCTCCAAGGAAAGCATAGA      |
| ECAD      | ATTTTTCCTCGACACCCGAT      | TCCCAGGCGTAGACCAAGA       |
| GAPDH     | ACCACAGTCCATGCCATCAC      | TCCACCACCCTGTTGCTGTA      |
| HIF1A     | CAAGAACCTACTGCTAATGC      | TTATGTATGTGGGTAGGAGATG    |
| IL10      | GCCTAACATGCTTCGAGATC      | TGATGTCTGGGTCTTGTTTC      |
| IL13      | GAGTGTGTTGTACCCGTTG       | TACTCGTTGGTCGAGAGCTG      |
| IL6       | ATGAACTCCTTCTCCACAAGCGC   | GAAGAGCCCTCAGGCTGGACTG    |
| KERA      | ATCTGCAGCACCTTACCTT       | CATTGGAATTGGTGGTTTGA      |
| LUM       | CCACCACACCTGACAGAGT       | CAAGTTGATTGACCTCCAGG      |
| MMP1      | AGCTAGCTCAGGATGACATTGATG  | GCCGATGGGCTGGACAG         |
| MMP3      | TTCCGCTGTCTCAGATGATAT     | AAAGGACAAAGCAGGATCACAGTT  |
| MMP9      | CACTGTCCACCCCTCAGAGC      | GCCACTTGTCGGCGATAAGG      |
| NCAD      | AGCCAACCTTAACTGAGGAGT     | GGCAAGTTGATTGGAGGGATG     |
| TP63      | GAGGTGGGCTGTTTCATCAT      | AGGAGATGAGAAGGGGAGGA      |
| PAX6      | ATAACCTGCCTATGCAACCC      | GGAACCTGAACTGGAACCTGAC    |
| ACTA2/SMA | CTCCCTGGAGAAGAGAAGAA      | TTTGGTGCTGATCTGTCCCT      |
| STAT3     | ACCCAACAGCCGCCGTAG        | CAGACTGGTTGTTTCCATTGAGAT  |
| TGFB1     | GAGGTGACCTGGCCACCATTCAT   | TCCGCAAGGACCTCGGCTGG      |
| TIMP1     | TTGTGGGACCTGTGGAAGTA      | CTGTTGTTGCTGTGGCTGAT      |
| TIMP2     | AAGCGGTCAGTGAGAAGGAGTGG   | CCTTGGAGGCTTTTTTGCAGTTG   |

|         |                      |                      |
|---------|----------------------|----------------------|
| VEGF    | CTACCTCCACCATGCCAAGT | GCAGTAGCTGCGCTGATAGA |
| VIM     | GGGACCTCTACGAGGAGGAG | CGCATTGTCAACATCCTGTC |
| β-Actin | TCTACAATGAGCTGCGTGTG | GGTGAGGATCTTCATGAGGT |

Supplementary Table S3: Software and Programs used in data analysis

| Software / program | Reference Link                                                                                                                                                                    |
|--------------------|-----------------------------------------------------------------------------------------------------------------------------------------------------------------------------------|
| bcl2fastq          | <a href="https://support.illumina.com/downloads/bcl2fastq_conversion_software_184.html">https://support.illumina.com/downloads/bcl2fastq_conversion_software_184.html</a>         |
| TopHat             | <a href="http://ccb.jhu.edu/software/tophat/manual.shtml">http://ccb.jhu.edu/software/tophat/manual.shtml</a>                                                                     |
| Cufflinks          | <a href="http://cole-trapnell-lab.github.io/cufflinks/cufflinks/index.html">http://cole-trapnell-lab.github.io/cufflinks/cufflinks/index.html</a>                                 |
| Cuffmerge          | <a href="http://cole-trapnell-lab.github.io/cufflinks/cuffmerge/">http://cole-trapnell-lab.github.io/cufflinks/cuffmerge/</a>                                                     |
| Cuffdiff           | <a href="http://cole-trapnell-lab.github.io/cufflinks/cuffdiff/index.html#cuffdiff-options">http://cole-trapnell-lab.github.io/cufflinks/cuffdiff/index.html#cuffdiff-options</a> |
| EbSeq              | <a href="https://bioconductor.org/packages/release/bioc/html/EBSeq.html">https://bioconductor.org/packages/release/bioc/html/EBSeq.html</a>                                       |
| Enrichr            | <a href="https://maayanlab.cloud/Enrichr/">https://maayanlab.cloud/Enrichr/</a>                                                                                                   |
| AmiGO              | <a href="http://amigo.geneontology.org/amigo">http://amigo.geneontology.org/amigo</a>                                                                                             |
| Genemania          | <a href="http://genemania.org/">http://genemania.org/</a>                                                                                                                         |
| STRING analysis    | <a href="https://string-db.org/">https://string-db.org/</a>                                                                                                                       |

Supplementary Table S4: GO Pathway level gene expression changes with respect to whole transcriptome

| Biological Process or Pathway | Number of DEGs |
|-------------------------------|----------------|
| Apoptosis                     | 126            |
| Cell motility                 | 1757           |
| Dedifferentiation             | 13             |
| Endocytosis                   | 688            |
| EMT                           | 158            |
| Epithelial motility           | 371            |
| Epithelial stem cells         | 15             |
| ECM                           | 748            |
| Inflammatory response         | 734            |
| Mitochondrial biogenesis      | 587            |
| Mitochondrion transport       | 325            |
| Respiration                   | 193            |
| Stem cell maintenance         | 160            |
| Stromal Cells                 | 29             |
| Tissue Remodelling            | 171            |
| Wound Healing                 | 559            |

Supplementary Table S5: DEGs (differentially expressed genes) of the wound healing pathway. DEGs of the wound healing pathway expressed by limbal stromal cells: table representing the log 2-fold change (relative to sclera) of each gene related to wound healing pathway in the corneal and limbal tissues, limbal stem cells (LMSC-P0 and LMSC-P3), and embryonic stem cell, obtained from the RNA-Seq analysis. The DEGs exclusively up-regulated in hLMSC-P3 are marked in red font.

| Gene     | Cornea   | Limbus   | LMSC-P0  | LMSC-P3  | ESC      |
|----------|----------|----------|----------|----------|----------|
| NINJ2    | 0        | 0        | -5.23127 | 0        | -3.35492 |
| PDGFB    | -2.51477 | 0        | 0        | -5.35556 | 0        |
| HRAS     | 1.832786 | 3.367234 | 3.562963 | 0        | 0        |
| LOX      | 0        | 0        | -2.78266 | 0        | 0        |
| PIK3R5   | -2.26322 | 0        | -6.62066 | 0        | 0        |
| TFPI     | 0        | 0        | 0        | 0        | -5.47078 |
| TGFB3    | -2.5733  | 0        | -4.44443 | -3.74229 | -8.29898 |
| ITGA2    | 0        | 3.183476 | 4.169108 | 0        | 0        |
| MIA3     | 0        | -2.64755 | 0        | 0        | 0        |
| CASP3    | 0        | 0        | 3.300929 | 0        | 0        |
| CAPN3    | 0        | 0        | 0        | 0        | -3.06752 |
| COL5A1   | 0.66819  | -0.47126 | -0.74931 | 3.536237 | -2.50102 |
| DCN      | 2.579354 | 0        | -7.36149 | 0        | -12.4682 |
| VANGL2   | 0        | 0        | 0        | -3.5835  | 3.47421  |
| DGKG     | -3.16601 | 0        | 0        | 0        | -3.7629  |
| FAM46A   | 0        | 0        | -3.29385 | 0        | -6.89736 |
| TYRO3    | 0        | 0        | 0        | 2.546345 | 6.490965 |
| PIK3R1   | 0        | 0        | -2.60888 | 0        | -4.85583 |
| EPB41L4B | 0        | 0        | 3.103199 | 0        | 0        |
| PLAU     | 0        | 5.192434 | 6.294242 | 0        | 0        |
| F10      | 2.745544 | 0        | -2.8447  | 0        | 0        |
| AJUBA    | 0        | 0        | 3.081285 | 0        | 0        |
| NFE2     | 0        | 0        | 2.617683 | 0        | 0        |
| CORO1B   | 0        | 0        | 0        | 0        | 4.127566 |
| FAP      | 1.807383 | 0        | 0        | 5.560921 | 0        |
| COL1A1   | 0        | 0        | 0        | 3.86146  | -3.83313 |
| THBS1    | 0        | 0        | 0        | 0        | -7.81011 |
| PDGFC    | 0        | 0        | 0        | 0        | -3.5404  |
| LYN      | -3.50507 | 0        | 0        | -2.55131 | 0        |
| WAS      | 0        | 0        | 0        | -3.74028 | -2.82917 |
| SYT7     | 0        | 0        | 0        | 5.266603 | 4.389419 |
| CDH3     | 0        | 4.704429 | 6.615209 | 0        | 6.076329 |
| EGFR     | 0        | 0        | 2.597162 | 0        | -3.92748 |
| PROS1    | 0        | -2.92341 | -3.12484 | 0        | -3.37538 |
| THBD     | -2.6107  | 0        | 0        | -4.26042 | -8.52853 |
| GPX1     | 0        | 2.668066 | 2.418445 | 0        | 3.96835  |

|          |          |          |          |          |          |
|----------|----------|----------|----------|----------|----------|
| PAK1     | 0        | 0        | 0        | 0        | 3.61732  |
| GPR4     | 0        | 0        | -5.4891  | -5.83821 | -4.39659 |
| AQP1     | 0        | 0        | -4.64258 | -5.70161 | -10.3474 |
| TPM1     | -2.39017 | 0        | 0        | 0        | 0        |
| ADAMTS13 | 2.111869 | 0        | 0        | 0        | 0        |
| LCP2     | -5.37817 | 0        | 0        | 0        | -6.68516 |
| SYT11    | 0        | 0        | 0        | 0        | -3.90405 |
| IL24     | 0        | 0        | 4.086686 | 0        | 0        |
| DDR1     | 0        | 3.660268 | 3.260083 | 0        | 4.044011 |
| GAP43    | 0        | -2.2722  | -3.34899 | 0        | 0        |
| GNG2     | 0        | 0        | -2.65049 | 0        | 0        |
| SGCA     | -4.56317 | 0        | -4.57815 | -3.07241 | -5.51146 |
| ANXA2    | 0        | 0        | 3.616335 | 0        | 0        |
| NOG      | 0        | 0        | 0        | -2.37342 | 0        |
| HMGCR    | 0        | 0        | 2.836812 | 0        | 0        |
| MMRN1    | -7.33323 | -2.37607 | 0        | 0        | -9.85315 |
| AK3      | -1.9465  | -2.55872 | 0        | 0        | -3.53179 |
| DOCK11   | 0        | -2.57736 | -4.19032 | 0        | 0        |
| SAA1     | 0        | 0        | -2.72692 | -10.0008 | -10.245  |
| F13A1    | 0        | 0        | 0        | -9.4405  | -9.68481 |
| F8       | -2.20121 | 0        | -4.56445 | -2.83822 | -5.22566 |
| SLC11A1  | 0        | 0        | -4.11502 | -4.10411 | -3.68568 |
| XBP1     | -2.20719 | 0        | 0        | 0        | 0        |
| DYSF     | -5.89888 | 0        | 0        | -4.66874 | 0        |
| DGKI     | -3.41685 | -3.66    | -3.63496 | -3.09929 | -4.85191 |
| F5       | -2.04803 | 0        | -2.18961 | -2.67939 | -4.18353 |
| SERPINE1 | -2.11516 | 0        | 0        | 0        | 0        |
| FGF2     | 0        | -2.42558 | 0        | 0        | 0        |
| FZD6     | -2.15041 | 0        | 0        | 0        | 0        |
| GNA14    | 0        | 0        | -3.10163 | 0        | -4.25479 |
| FIBP     | 0        | 0        | 0        | 2.448933 | 3.660078 |
| DMTN     | -2.84999 | 0        | 0        | 0        | -3.44993 |
| P2RY1    | -3.49211 | 0        | 0        | 0        | 0        |
| TEC      | 1.806587 | 0        | 0        | 0        | 0        |
| NFE2L2   | 0        | -2.26678 | 0        | 0        | -4.73648 |
| PRKCQ    | 0        | 0        | 2.426271 | -3.73934 | 0        |
| PIK3CA   | 0        | -2.55483 | 0        | 0        | 0        |
| PRKCB    | -3.48319 | 0        | -5.36979 | 0        | 0        |
| DSP      | 0        | 0        | 3.241288 | 0        | 0        |
| RHOB     | 0        | 0        | -4.07348 | -3.18475 | 0        |
| IRF1     | 0        | 0        | 0        | 0        | -3.91348 |
| ENPP4    | -2.0331  | -2.23882 | 0        | -4.27637 | 0        |

|           |          |          |          |          |          |
|-----------|----------|----------|----------|----------|----------|
| GNA15     | 0        | 3.650278 | 3.137443 | -5.16112 | -4.06214 |
| ITPR1     | -2.04391 | 0        | -2.51376 | -2.63272 | -3.88052 |
| VAV3      | 0        | 0        | 0        | -4.85475 | 0        |
| IL6       | -7.29547 | 0        | -4.16075 | -3.2859  | -9.92415 |
| NOS3      | 0        | 0        | -5.17644 | -5.52846 | 0        |
| VAV1      | -3.2494  | 0        | 0        | 0        | 0        |
| FERMT3    | -1.71929 | 0        | -4.61095 | -3.97168 | -3.05553 |
| MAFF      | 0        | 0        | 0        | -2.81005 | -3.64575 |
| NDNF      | 2.46284  | 0        | -4.15801 | -5.42261 | -6.87786 |
| SERPINA10 | 0        | 3.828114 | 0        | 0        | 0        |
| HPSE      | 2.914521 | 0        | 0        | 0        | 0        |
| P2RX2     | 0        | 0        | 0        | 0        | 3.160633 |
| RHOG      | 0        | 2.118921 | 0        | 0        | 0        |
| PAPSS2    | -3.57971 | -4.18829 | -4.39497 | 0        | -5.1945  |
| ITPR3     | 0        | 2.769782 | 0        | 0        | 0        |
| ITPR2     | 0        | -2.44213 | 0        | 0        | 0        |
| SPRR3     | -4.81098 | -2.76053 | -2.46869 | -6.91649 | 0        |
| EDN1      | -2.72981 | 0        | 0        | -5.78981 | -4.30824 |
| DOCK8     | -3.12418 | 0        | 0        | -5.61113 | -3.95624 |
| PLAT      | 0        | 0        | 0        | 0        | -3.07459 |
| PHF21A    | 0        | -2.47994 | -2.86772 | 0        | 0        |
| FZD7      | 1.895351 | 0        | 0        | 3.081614 | 3.632971 |
| OPRM1     | 2.378145 | 0        | 0        | 0        | 0        |
| ANXA1     | 0        | 0        | 0        | 0        | -6.9553  |
| CEACAM1   | -2.9542  | 0        | 0        | -5.49174 | -3.96065 |
| ADRA2A    | -6.03673 | 0        | -7.79257 | -6.02108 | 0        |
| SDC1      | 0        | 3.01652  | 2.998155 | 0        | 0        |
| ADRA2C    | 0        | 3.444676 | 0        | 0        | 5.111435 |
| HMG20B    | 0        | 0        | 0        | 0        | 3.590148 |
| TLR4      | 0        | 0        | -3.01585 | 0        | -6.57663 |
| PLEK      | -3.47793 | 0        | -7.01405 | -6.07916 | 0        |
| CD177     | 0        | 0        | 0        | 0        | 6.681476 |
| MYOF      | 0        | 0        | 0        | 0        | -5.36592 |
| CPQ       | 0        | 0        | -4.00862 | 0        | -3.75957 |
| CD36      | -2.03016 | -2.17335 | -4.79185 | -5.27811 | -4.35859 |
| ZFPM2     | -4.14004 | 0        | -2.65167 | 0        | 0        |
| TRPC6     | 0        | 0        | -2.74029 | 0        | 0        |
| GATA6     | -3.82622 | 0        | -2.58458 | 0        | -4.77892 |
| LGR6      | 2.320525 | 4.748744 | 0        | 0        | 0        |
| ERBB3     | 0        | 2.312442 | 2.282257 | -2.50787 | 0        |
| FGFR2     | 0        | 0        | 0        | -4.9523  | 0        |
| WNT7A     | -1.5838  | 3.425595 | 8.163797 | -0.59201 | 0        |

|          |          |          |          |          |          |
|----------|----------|----------|----------|----------|----------|
| MSX2     | 0        | 3.005035 | 0        | 0        | 0        |
| EREG     | -2.53678 | 0        | 0        | -6.26118 | -6.50813 |
| MERTK    | 0        | 0        | -3.47363 | -6.44044 | 0        |
| DOCK9    | 0        | 0        | 0        | 0        | -3.71523 |
| ERBB2    | 0        | 0        | 0        | 0        | 3.528435 |
| CD44     | 0        | 0        | 0        | 0        | -5.30615 |
| HBEGF    | -2.08517 | 0        | 0        | -6.05469 | -5.28519 |
| F2R      | 0        | 0        | -3.16536 | 0        | -4.07475 |
| F3       | 0        | 0        | 4.887113 | 0        | 0        |
| CFLAR    | 0        | 0        | 0        | 0        | -4.68211 |
| ACVRL1   | 0        | 0        | -3.94991 | 0        | -5.0106  |
| SERPING1 | 0        | 0        | -6.41767 | -3.85804 | -4.75367 |
| SERPINA5 | 0        | 0        | -7.69828 | -5.30207 | -6.32861 |
| PRKCG    | -2.0461  | -2.86124 | 0        | -4.11737 | 0        |
| SERPINB2 | 0        | 3.121542 | 6.102776 | -5.9998  | -6.65101 |
| S100A8   | -3.83339 | 0        | 0        | -6.57866 | 0        |
| KLKB1    | 0        | 0        | 0        | 0        | 3.154892 |
| FCER1G   | -4.54678 | 0        | -6.79315 | -6.65235 | -5.2082  |
| APOD     | 0        | 0        | -11.3007 | -8.58788 | -13.4434 |
| IGF1     | -3.97979 | -3.9226  | -6.4183  | -3.7711  | -6.22037 |
| PROCR    | -2.27369 | 0        | 0        | 0        | 0        |
| B4GALT1  | 0        | 0        | 0        | 0        | -3.77272 |
| INSL3    | 0        | 0        | 0        | 0        | 3.769195 |
| SELP     | 0        | 0        | -6.28883 | 0        | 0        |
| ITGA9    | -2.10217 | 0        | -4.442   | -4.79384 | 0        |
| IL1A     | 0        | 0        | 7.202457 | 0        | 0        |
| F2RL1    | 0        | 2.534567 | 0        | 0        | 0        |
| FBLN1    | -4.55666 | 0        | -4.48429 | 0        | 0        |
| MYLK     | -4.91066 | -2.86047 | 0        | 0        | -3.68882 |
| ELK3     | 0        | 0        | 0        | 0        | -3.81392 |
| VWF      | -7.16082 | 0        | -6.67973 | -6.19125 | -6.80509 |
| CCNB1    | 0        | 0        | 6.304379 | 4.316678 | 6.203304 |
| CSRP1    | 0        | 0        | 0        | 0        | -7.19212 |
| MMP12    | -3.05423 | 0        | -3.12046 | -6.37566 | 0        |
| FOXC2    | -3.04762 | 0        | -4.57513 | -2.38727 | 0        |
| A2M      | -5.86123 | 0        | -5.36331 | -5.30088 | -9.57282 |
| JMJD1C   | -2.7686  | -2.94745 | -2.71119 | -3.11511 | 0        |
| P2RX7    | 0        | 0        | -2.45544 | 0        | -3.42762 |
| KLK6     | 0        | 0        | 10.39122 | 0        | 0        |
| ADRA2B   | -4.41813 | 0        | -5.3317  | 0        | 0        |
| ALOX12   | 0        | 0        | 0        | 0        | 2.984507 |
| TNFAIP3  | 0        | 0        | 0        | -4.74787 | -7.59542 |

|          |          |          |          |          |          |
|----------|----------|----------|----------|----------|----------|
| NOV      | -2.74528 | 0        | -5.17591 | 0        | -4.25806 |
| PIK3CG   | -2.52735 | 0        | -5.84927 | 0        | 0        |
| TIMP1    | -0.19688 | -0.43101 | -1.27099 | 4.03621  | -2.39514 |
| SERPINA1 | -3.51665 | 0        | 0        | -4.14847 | -5.59633 |
| MCAM     | -4.84744 | 0        | 0        | -3.98641 | 0        |
| GSN      | 0        | 0        | 0        | 0        | -5.99734 |
| SOX2     | -2.3027  | 0        | 0        | 0        | 6.134517 |
| CYR61    | 0        | 0        | -3.19586 | -3.43559 | -5.71079 |
| CD109    | 0        | 0        | 0        | 0        | -3.8075  |
| PTPN12   | 0        | -2.62354 | 0        | 0        | 0        |
| SDC4     | 0        | 2.567824 | 0        | 0        | 0        |
| LCK      | 0        | 0        | 0        | 0        | 5.504203 |
| HPS6     | 0        | 0        | 2.800695 | 0        | 4.250846 |
| UBASH3B  | 0        | 0        | 2.841311 | 0        | 0        |
| RHOC     | 0        | 0        | 2.463326 | 0        | 0        |
| PDPN     | 0        | 0        | -2.55325 | -3.42492 | 0        |
| PDGFRA   | 0        | 0        | -3.93987 | 0        | -9.7373  |
| ETS1     | -3.13542 | 0        | 0        | 0        | -4.04023 |
| STXBP3   | 0        | -2.15029 | 0        | 0        | 0        |
| HIST1H3A | 0        | 0        | 0        | 0        | 4.88989  |
| ARHGEF19 | 0        | 0        | 0        | 0        | 3.281424 |
| WNT5A    | 2.665635 | 0        | 0        | 0        | -4.82207 |
| FZD9     | 0        | 3.19743  | 0        | 0        | 6.015469 |
| CYP4F11  | 1.821227 | 0        | 0        | 0        | 0        |
| CX3CL1   | -3.42449 | 0        | 0        | -5.5505  | -6.01168 |
| PKM      | 0        | 2.483063 | 3.375072 | 3.080076 | 0        |
| WNT4     | 0        | 2.372188 | 0        | -2.99886 | 0        |
| WNT3A    | 0        | 3.795823 | 0        | 0        | 0        |
| DGKZ     | 0        | 0        | 0        | 0        | 3.804195 |
| TNC      | -5.59184 | 0        | 0        | 0        | -7.55184 |
| BCL9     | -2.2746  | 0        | 0        | 0        | 0        |
| TFPI2    | -3.25866 | 0        | 4.549003 | 0        | 0        |
| SCARB1   | 0        | 0        | 2.829801 | 0        | 3.171203 |
| SYK      | 0        | 0        | 0        | -5.00116 | 0        |
| PRKAR2B  | -2.93367 | -3.22655 | -4.19524 | 0        | 0        |
| PRKAR1B  | 0        | 0        | 2.34458  | 0        | 4.198816 |
| IFRD1    | 0        | 0        | -2.77157 | -2.55441 | 0        |
| RAB27A   | 0        | -2.75757 | 0        | 0        | -3.77985 |
| C1QTNF1  | -2.90975 | 0        | 0        | -2.63697 | -6.50289 |
| P2RX6    | 2.19859  | 0        | 0        | 0        | 0        |
| FGF10    | 1.955867 | 0        | -4.22119 | 0        | 0        |
| PRKCH    | -3.31612 | 0        | 0        | -5.55223 | 0        |

|          |          |          |          |          |          |
|----------|----------|----------|----------|----------|----------|
| ADAM15   | 0        | 0        | 2.703885 | 0        | 0        |
| EHD3     | 2.968711 | 0        | 2.312954 | 3.008271 | 0        |
| HBB      | -5.7002  | -2.23384 | -4.12788 | -3.61858 | -3.48822 |
| GRHL3    | 0        | 3.762522 | 3.335591 | -4.47326 | 0        |
| MAP3K5   | -4.25796 | -2.51692 | 0        | 0        | -4.59836 |
| METAP1   | 0        | 0        | 2.61445  | 0        | 0        |
| EZH2     | -1.84181 | 0        | 0        | 0        | 0        |
| ITGB3    | -3.43008 | 0        | 0        | 0        | -6.4376  |
| RAC2     | -3.57568 | 0        | 2.473802 | 0        | 0        |
| CD59     | 0        | 0        | 0        | 0        | -3.38667 |
| ENO3     | 0        | 0        | 0        | 0        | 4.09129  |
| ANXA8    | 0        | 3.409807 | 3.695579 | 0        | 0        |
| CD34     | 2.787035 | 0        | -6.91657 | -5.51743 | -7.8455  |
| EPPK1    | 0        | 3.936338 | 2.819558 | -4.27339 | 0        |
| CCL20    | -2.88764 | 0        | 0        | 0        | 0        |
| ITGA2B   | 0        | 0        | 0        | 0        | 4.201197 |
| DGKH     | 0        | 0        | 0        | 0        | -3.02228 |
| AGER     | 0        | 0        | -2.35574 | 0        | 0        |
| SCUBE1   | -5.84013 | 0        | 0        | 0        | -4.41072 |
| F2RL2    | -2.9459  | 0        | -4.57929 | 0        | -7.06057 |
| PRKG1    | 0        | -2.20661 | -3.53969 | 0        | 0        |
| P2RX1    | 0        | 0        | -3.21562 | -3.07187 | 0        |
| NRG1     | 0        | 3.455654 | 5.69539  | 2.812886 | 0        |
| TC2N     | 0        | 0        | 0        | -5.64989 | 0        |
| WFDC1    | 4.388329 | 0        | 0        | -2.87854 | 0        |
| MYH10    | -2.00516 | -2.60405 | 0        | 0        | 0        |
| GATA2    | -3.15698 | 0        | -3.83245 | 0        | -3.96542 |
| DGKA     | 0        | 0        | 3.552658 | 0        | 0        |
| PDCD10   | 0        | -2.12248 | 0        | 0        | 0        |
| PRKCE    | 0        | 0        | 0        | 0        | -3.73195 |
| SH2B2    | 0        | 0        | 0        | 0        | 2.884399 |
| TFF3     | 2.055269 | 3.312975 | 0        | 0        | 0        |
| SERPINF2 | -3.80776 | 0        | -5.11472 | -6.73975 | -3.53702 |
| CELSR1   | 0        | 4.245726 | 3.761182 | 0        | 0        |
| SCARA5   | -5.70063 | 0        | -8.5801  | -9.02178 | -9.2662  |
| TGFBR2   | 0        | 0        | 0        | 0        | -6.21731 |
| PRKACB   | 0        | -2.37065 | 0        | 0        | 0        |
| PTPN6    | 0        | 0        | 0        | -5.15757 | 0        |
| SOX15    | 0        | 4.992838 | 3.252009 | -2.65174 | 0        |
| CAV1     | -4.1157  | 0        | 2.942347 | 3.055389 | -4.33879 |
| PDGFRB   | 0        | 0        | 0        | 0        | -4.23707 |
| HMOX1    | -3.45552 | 2.418724 | 0        | 0        | 0        |



|        |          |          |          |          |          |
|--------|----------|----------|----------|----------|----------|
| APOE   | 0        | 2.673705 | 0        | 0        | 8.638168 |
| DCBLD2 | 0        | 0        | 5.575163 | 0        | 0        |
| CCM2L  | 0        | 0        | 0        | 0        | 3.970996 |
| JAK2   | -1.90978 | -3.07591 | 0        | 0        | -4.71348 |
| KRT6A  | -3.38849 | 0        | 5.455358 | -3.79927 | -8.41348 |
| WNT5B  | 0        | 0        | 2.848565 | 3.582366 | 0        |
| F2RL3  | 0        | 0        | -5.56458 | -4.1391  | 0        |
| PDGFD  | 0        | 0        | -6.13257 | 0        | -6.68398 |

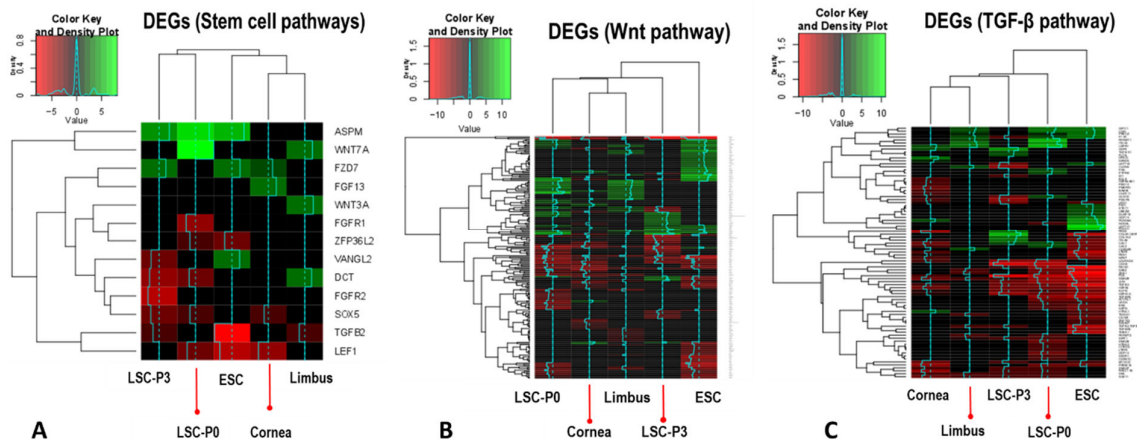

Supplementary Figure S1: DEGs of stem cell, TGF- $\beta$  and Wnt signaling pathways. Heatmaps showing the differential expression of the genes belonging to stem cell pathway (A), Wnt signaling pathway (B), and TGF $\beta$  signaling pathway (C) expressed by cornea, limbus, LMSC-P3, LMSC-P0 and ESC (represented as columns) with respect to sclera. Each row corresponds to a single gene and the change in color from blue to red indicate enrichment of the genes specific to its particular pathway. Green (highlighted) boxes in the map represent the significant ( $p < 0.05$ ) up-regulation, red boxes represent significant down-regulation and black indicates insignificant ( $p \geq 0.05$ ) differences in gene expression, with respect to sclera (control).

**Supplementary Table S6:** DEGs of the Stem cell, TGF- $\beta$ , and Wnt signaling pathways expressed by limbal stromal cells: table representing the log 2-fold change (relative to sclera) of each gene related to Stem cell, TGF- $\beta$  and Wnt signaling pathways in the corneal and limbal tissues, limbal stem cells (LMSC-P0 and LMSC-P3) and embryonic stem cell, obtained from the RNA-Seq analysis.

| Gene                                                    | LMSCP3   | LMSCP0   | ESC      | Cornea   | Limbus   |
|---------------------------------------------------------|----------|----------|----------|----------|----------|
| <b><u>Stem cell signalling pathways</u></b>             |          |          |          |          |          |
| SOX5                                                    | -3.67946 | -2.46716 | 0        | -1.91442 | 0        |
| FGFR2                                                   | -4.9523  | 0        | 0        | 0        | 0        |
| WNT7A                                                   | -0.59201 | 8.163797 | 0        | -1.5838  | 3.425595 |
| DCT                                                     | -4.25981 | -2.8202  | 0        | 0        | 3.018192 |
| WNT3A                                                   | 0        | 0        | 0        | 0        | 3.795823 |
| VANGL2                                                  | -3.5835  | 0        | 3.47421  | 0        | 0        |
| LEF1                                                    | 0        | -3.7229  | -5.43219 | -4.48318 | 0        |
| TGFB2                                                   | -2.71935 | 0        | -7.76926 | 0        | -2.48183 |
| ASPM                                                    | 4.575232 | 6.133352 | 5.409098 | 0        | 0        |
| FGF13                                                   | 0        | 0        | 0        | 3.541949 | 0        |
| FGFR1                                                   | 0        | -4.21262 | 0        | 0        | 0        |
| ZFP36L2                                                 | 0        | -2.50251 | -3.25638 | 0        | 0        |
| FZD7                                                    | 3.081614 | 0        | 3.632971 | 1.895351 | 0        |
| <b><u>TGF-<math>\beta</math> Signalling pathway</u></b> |          |          |          |          |          |
| PDGFB                                                   | -2.51477 | 0        | 0        | -5.35556 | 0        |
| FOS                                                     | -2.2883  | 0        | -8.63988 | -7.7411  | -8.3862  |
| ACVRL1                                                  | 0        | 0        | 0        | -3.94991 | -5.0106  |
| SOX11                                                   | -4.89062 | -3.09812 | -3.30244 | -3.35014 | 0        |
| HTRA3                                                   | 0        | 0        | 0        | -2.50128 | 0        |
| FBN2                                                    | -5.52898 | 0        | 4.247491 | 0        | 0        |
| FBN1                                                    | -1.98998 | 0        | 0        | 0        | -5.63801 |
| LTBP4                                                   | 0        | 0        | 0        | -2.60438 | 0        |
| COL1A2                                                  | 0        | 0        | 4.444916 | 0        | -3.69186 |
| ITGA8                                                   | -2.14716 | 0        | 4.00273  | 0        | -5.15967 |
| HSPA5                                                   | -4.20925 | 0        | -4.14648 | -4.38859 | -5.84089 |
| CD109                                                   | 0        | 0        | 0        | 0        | -3.8075  |
| CITED2                                                  | 0        | 0        | 0        | -2.59367 | 0        |
| GDF15                                                   | 0        | 0        | 0        | 0        | 4.702094 |
| SDCBP                                                   | 0        | 0        | 0        | 0        | -3.38985 |
| HTRA1                                                   | 2.904047 | 0        | 0        | 0        | -3.65591 |
| GIPC1                                                   | 0        | 3.544737 | 0        | 4.62317  | 3.796651 |
| PMEPA1                                                  | -4.11641 | 0        | 0        | 0        | 0        |
| TGFBR3                                                  | 0        | 0        | 0        | -5.59763 | -6.70427 |
| CAV1                                                    | -4.1157  | 0        | 3.055389 | 2.942347 | -4.33879 |

|          |          |          |          |          |          |
|----------|----------|----------|----------|----------|----------|
| ITGA3    | 0        | 3.900411 | 0        | 5.326104 | 0        |
| PEG10    | -2.53551 | 0        | 0        | 0        | 0        |
| FUT8     | 0        | 0        | 2.795841 | 0        | 0        |
| PIN1     | 0        | 0        | 0        | 0        | 3.57466  |
| GDF10    | 0        | 0        | 0        | -3.71076 | 0        |
| ID1      | 0        | 0        | -2.49156 | 0        | 0        |
| HSPA1A   | -2.21032 | 0        | -5.52505 | -4.72885 | -5.91505 |
| TGFBR2   | 0        | 0        | 0        | 0        | -6.21731 |
| SKIL     | -3.20579 | -3.50819 | -3.05667 | -3.20496 | 0        |
| COL3A1   | 0        | 0        | 6.867821 | 0        | -7.03659 |
| FERMT1   | 0        | 2.877748 | 0        | 7.000093 | 0        |
| ZNF703   | 0        | 0        | 0        | 0        | -3.35397 |
| DAB2     | 0        | -2.33844 | 0        | -3.77695 | -7.21337 |
| THBS1    | 0        | 0        | 0        | 0        | -7.81011 |
| RASL11B  | -5.26786 | 0        | -3.15333 | -2.89147 | 0        |
| BAMBI    | -3.24905 | 0        | 0        | 0        | 0        |
| KLF10    | -2.03719 | 0        | -3.9004  | -3.33433 | -5.08257 |
| LRG1     | -1.90458 | 0        | -4.72583 | 0        | -2.86031 |
| SMAD9    | -5.16455 | -2.33013 | -3.02749 | -5.68617 | -7.41273 |
| LDLRAD4  | -2.75155 | 0        | -6.02158 | -6.55893 | 0        |
| SMAD7    | -3.37006 | 0        | -2.62556 | -3.26215 | 0        |
| DUSP15   | 0        | 0        | 0        | 0        | 2.879924 |
| CGN      | 0        | 2.918009 | 0        | 3.759838 | 4.579773 |
| UBE2M    | 0        | 0        | 0        | 0        | 3.31988  |
| NODAL    | 0        | 0        | 0        | -2.73046 | 6.183362 |
| JUN      | 0        | 0        | -4.47018 | -5.77923 | -5.6497  |
| CHST11   | -3.53693 | 0        | 0        | 0        | 0        |
| PARD6A   | 2.635301 | 0        | 0        | 0        | 5.863364 |
| ENG      | 0        | 0        | 0        | -2.4532  | -4.46864 |
| CAV2     | -3.10544 | 0        | 0        | 2.393166 | -4.05639 |
| LEFTY2   | 0        | 0        | -5.10998 | 0        | 3.527836 |
| FMOD     | 0        | 0        | -3.22283 | -6.6357  | -11.0862 |
| TGFB2    | 0        | -2.48183 | -2.71935 | 0        | -7.76926 |
| HSP90AB1 | -2.48869 | 0        | 0        | 0        | 0        |
| CDKN1C   | 0        | 0        | 0        | -3.38269 | 0        |
| SKOR1    | 0        | 0        | 0        | -3.12867 | 0        |
| GDF5     | 2.890191 | 0        | 5.485205 | 0        | 0        |
| F11R     | 0        | 3.108017 | -2.42563 | 3.093681 | 3.847162 |
| BCL9     | -2.2746  | 0        | 0        | 0        | 0        |
| CLDN5    | 0        | 2.228003 | -5.76163 | 0        | 0        |
| NPNT     | -3.46855 | 0        | 0        | 0        | -4.42115 |
| STK11    | 0        | 0        | 0        | 0        | 3.496187 |

|                                      |          |          |          |          |          |
|--------------------------------------|----------|----------|----------|----------|----------|
| PRKCZ                                | 0        | 2.140624 | 0        | 2.146655 | 4.449374 |
| MYOCD                                | -4.71764 | 0        | -3.57263 | 0        | -3.35815 |
| CDH5                                 | 0        | 0        | -8.69042 | -7.44243 | 0        |
| GCNT2                                | -2.13899 | 0        | -5.03088 | 2.990947 | 0        |
| ASPN                                 | 0        | 0        | 0        | -2.67927 | -4.64704 |
| VASN                                 | 0        | 0        | 0        | -2.72378 | -3.13072 |
| SIRT1                                | 0        | -2.1351  | -2.6792  | -3.12729 | 0        |
| PRDM16                               | -5.44768 | 0        | 0        | -3.78611 | -3.75311 |
| TWSG1                                | 0        | -2.61025 | 0        | 0        | -3.62704 |
| DAND5                                | 1.814331 | 0        | 0        | 0        | 0        |
| USP9Y                                | 3.356518 | 4.273204 | 0        | 7.896141 | 0        |
| TGFB3                                | -2.5733  | 0        | -3.74229 | -4.44443 | -8.29898 |
| SMAD6                                | 0        | 0        | 0        | -4.33977 | 0        |
| FERMT2                               | 0        | -2.58759 | 0        | -2.76481 | 0        |
| CDKN2B                               | 0        | 2.907641 | 0        | 0        | -4.56348 |
| LEFTY1                               | 0        | 0        | 0        | 0        | 9.322444 |
| PXN                                  | 0        | 0        | 0        | 2.662403 | 0        |
| HPGD                                 | 4.399931 | 0        | 0        | 0        | 0        |
| ZEB1                                 | 0        | -3.49661 | 0        | -4.77607 | -9.80105 |
| FOXH1                                | 0        | 0        | 0        | 0        | 7.789636 |
| TGFB1I1                              | 0        | 0        | 2.977089 | 0        | 0        |
| LTBP2                                | -3.3408  | 0        | 0        | 0        | -7.15267 |
| <b><u>Wnt Signalling pathway</u></b> |          |          |          |          |          |
| CDK14                                | 0        | 0        | -2.31221 | 0        | 0        |
| TBX18                                | 0        | 0        | 0        | 2.580988 | -5.06074 |
| FRAT2                                | 0        | 0        | 2.31218  | 0        | 5.285946 |
| GPRC5B                               | -2.9883  | 0        | 0        | 0        | 0        |
| GRK5                                 | 0        | 0        | 0        | 0        | -5.78719 |
| SHISA2                               | 0        | 0        | 0        | -3.97169 | 0        |
| FZD2                                 | 0        | 0        | 0        | 4.061838 | 4.180237 |
| NDRG2                                | 0        | 0        | 0        | -5.68879 | 0        |
| PLCB1                                | -3.09322 | 0        | 0        | 0        | 0        |
| PPP1CA                               | 2.312287 | 0        | 0        | 0        | 3.863012 |
| MCC                                  | 0        | 0        | 0        | 0        | -3.93398 |
| SDC1                                 | 2.998155 | 0        | 3.01652  | 0        | 0        |
| TRABD2B                              | 0        | -2.66551 | -2.21209 | 0        | -2.93616 |
| LGR4                                 | 2.308584 | 0        | 0        | 0        | 0        |
| NRARP                                | 0        | 0        | 2.99954  | -5.11657 | 0        |
| DACT3                                | -3.55081 | -1.93712 | 0        | 0        | 0        |
| LGR6                                 | 0        | 2.320525 | 4.748744 | 0        | 0        |
| PITX2                                | -4.33846 | 0        | 0        | 0        | -7.34258 |

|          |          |          |          |          |          |
|----------|----------|----------|----------|----------|----------|
| FGFR2    | 0        | 0        | 0        | -4.9523  | 0        |
| WNT7A    | 8.163797 | -1.5838  | 3.425595 | -0.59201 | 0        |
| LRRK2    | -4.06307 | 0        | 0        | 0        | -5.95243 |
| AP2S1    | 2.392438 | 0        | 0        | 2.646079 | 3.593135 |
| RNF138   | 0        | -2.2616  | 0        | 0        | 0        |
| LEO1     | 0        | 0        | -2.05488 | 0        | 0        |
| SOX2     | 0        | -2.3027  | 0        | 0        | 6.134517 |
| DEPDC1B  | 5.924036 | 0        | 0        | 0        | 6.462453 |
| WNT6     | -3.03612 | 0        | 0        | 0        | 0        |
| MDFI     | 3.018678 | -3.33432 | 2.31346  | -3.02404 | 0        |
| SFRP4    | -6.64555 | -4.834   | -4.27473 | 0        | -8.39998 |
| CSNK1G3  | 0        | 0        | -2.31728 | 0        | 0        |
| RSP02    | -5.80789 | -5.13418 | -2.3541  | 0        | -4.87316 |
| DKK1     | 3.620547 | 0        | 0        | 4.405673 | 0        |
| FRAT1    | 0        | 0        | 2.19674  | 0        | 3.737593 |
| GLI1     | 0        | 0        | 0        | 0        | 4.764286 |
| ARNTL    | -2.82946 | 0        | 0        | 0        | -4.85424 |
| IFT20    | 0        | 0        | 0        | 2.728297 | 0        |
| RYR2     | -2.32613 | -2.52069 | 0        | 0        | 0        |
| GPC3     | -3.8297  | -3.53904 | 0        | -5.28435 | 3.365181 |
| WNT9A    | 3.617588 | 2.833198 | 3.310776 | 0        | 0        |
| CTNND2   | -4.21157 | -3.53517 | -2.72186 | 0        | 0        |
| DKK2     | -4.25642 | 2.628251 | 0        | 0        | 0        |
| FOXO1    | -2.39216 | 0        | 0        | -3.89163 | 0        |
| NKD1     | -2.68813 | 0        | 0        | -6.53459 | 0        |
| JUP      | 4.283844 | 0        | 4.222752 | 0        | 0        |
| ARHGEF19 | 0        | 0        | 0        | 0        | 3.281424 |
| WNT5A    | 0        | 2.665635 | 0        | 0        | -4.82207 |
| FZD9     | 0        | 0        | 3.19743  | 0        | 6.015469 |
| CAV1     | 2.942347 | -4.1157  | 0        | 3.055389 | -4.33879 |
| RNF43    | 3.266244 | 0        | 2.146427 | -3.58755 | 0        |
| PLCB3    | 2.322683 | 0        | 2.129307 | 0        | 3.599881 |
| DACT1    | -4.93764 | -4.91435 | -2.71743 | -3.1841  | -3.55244 |
| HHEX     | -5.64511 | 0        | 0        | 0        | -2.88426 |
| IGFBP6   | 0        | 3.921347 | 0        | 2.826069 | -4.76709 |
| ITGA3    | 5.326104 | 0        | 3.900411 | 0        | 0        |
| DVL1     | 2.599764 | 0        | 0        | 0        | 3.819145 |
| CCNE1    | 2.437851 | -2.52508 | 0        | 0        | 4.155652 |
| WNT7B    | 0        | 0        | 3.747699 | 0        | 0        |
| WNT4     | 0        | 0        | 2.372188 | -2.99886 | 0        |
| WNT3A    | 0        | 0        | 3.795823 | 0        | 0        |
| CSNK1G2  | 0        | 0        | 0        | 0        | 3.467835 |

|          |          |          |          |          |          |
|----------|----------|----------|----------|----------|----------|
| RSPO3    | -2.59502 | -2.79537 | 0        | -2.43678 | 0        |
| PIN1     | 0        | 0        | 0        | 0        | 3.57466  |
| PLCB2    | 0        | 0        | 0        | -3.27618 | 0        |
| WLS      | 0        | -1.75371 | 0        | 0        | -4.28858 |
| WNT11    | -6.37834 | -4.97507 | 0        | -5.67326 | -5.08202 |
| FRZB     | -5.85794 | -5.31014 | 0        | -5.28809 | -2.86674 |
| SLC9A3R1 | 0        | -1.8152  | 0        | 0        | 0        |
| DACT2    | 0        | 0        | 4.065302 | 0        | 2.839232 |
| FGF10    | -4.22119 | 1.955867 | 0        | 0        | 0        |
| FZD5     | 0        | 0        | 0        | -4.95558 | 0        |
| NXN      | 4.026208 | 0        | 3.249803 | 4.041176 | 4.125252 |
| MAGI2    | -4.57972 | 0        | 0        | 0        | 0        |
| VANGL1   | 3.267428 | 0        | 0        | 0        | 0        |
| VANGL2   | 0        | 0        | 0        | -3.5835  | 3.47421  |
| ZEB2     | -4.26904 | 0        | 0        | 0        | -9.2367  |
| BICC1    | 0        | 0        | 0        | 0        | -6.83572 |
| JADE1    | -2.87492 | 0        | 0        | 0        | 0        |
| PFN1     | 0        | 0        | 0        | 0        | 3.689852 |
| IGFBP4   | -2.97632 | 0        | 0        | 0        | 0        |
| CYLD     | 0        | 0        | 0        | 0        | -5.29762 |
| TCF7L2   | -2.30213 | 0        | 0        | 0        | 0        |
| TNN      | -9.07401 | -5.96824 | -3.01638 | -8.85936 | -8.26415 |
| GREM1    | 6.308248 | -3.25508 | 2.10436  | 8.134189 | 0        |
| COL1A1   | 0        | 0        | 0        | 3.86146  | -3.83313 |
| FERMT1   | 7.000093 | 0        | 2.877748 | 0        | 0        |
| SOX4     | 0        | -1.99354 | 0        | 0        | 0        |
| ZNF703   | 0        | 0        | 0        | 0        | -3.35397 |
| DAB2     | -3.77695 | 0        | -2.33844 | 0        | -7.21337 |
| BMP2     | 0        | 0        | 0        | -2.48081 | -2.85949 |
| BAMBI    | 0        | -3.24905 | 0        | 0        | 0        |
| PRKAA1   | 0        | 0        | -2.24214 | 0        | -3.42797 |
| SFRP5    | 0        | -3.33241 | 0        | 0        | 0        |
| CPZ      | -4.98025 | 0        | -2.91251 | 0        | 0        |
| TMEM198  | 0        | 0        | 0        | 0        | 3.611486 |
| GNAO1    | 0        | 0        | 0        | -3.3348  | 0        |
| CCND1    | 4.090886 | 0        | 0        | 3.270751 | 0        |
| APCDD1   | 0        | 0        | 0        | 0        | -3.67854 |
| SOX7     | 0        | -2.03853 | 0        | -6.47092 | -4.96516 |
| TIAM1    | 0        | 0        | 2.624656 | 0        | 0        |
| FUZ      | 0        | 0        | 0        | 0        | 4.084022 |
| APOE     | 0        | 0        | 2.673705 | 0        | 8.638168 |
| DLX5     | -3.88005 | -2.47262 | 0        | 0        | -3.44238 |

|          |          |          |          |          |          |
|----------|----------|----------|----------|----------|----------|
| TMEM88   | -6.13849 | 0        | 0        | -6.48777 | 0        |
| PPP3CA   | 0        | 0        | 0        | 0        | -3.16652 |
| NKD2     | -4.00004 | 0        | 0        | -3.48492 | 0        |
| RNF146   | 0        | 0        | -2.36491 | 0        | 0        |
| MBD2     | 0        | 0        | 0        | 0        | -3.36297 |
| TNIK     | 0        | -2.75701 | 0        | 0        | 0        |
| RBPJ     | 0        | 0        | -2.17311 | 0        | 0        |
| GNG2     | -2.65049 | 0        | 0        | 0        | 0        |
| LEF1     | -3.7229  | -4.48318 | 0        | 0        | -5.43219 |
| FOXO3    | -2.48049 | 0        | 0        | 0        | -4.19983 |
| NOG      | 0        | 0        | 0        | -2.37342 | 0        |
| PSMD2    | 2.695562 | 0        | 0        | 0        | 0        |
| WNT2     | 0        | 0        | 0        | 7.8247   | 0        |
| WWTR1    | 0        | -2.1292  | 0        | 0        | -5.29775 |
| MARK1    | 0        | -3.30635 | 0        | -4.86852 | 0        |
| PTPRO    | -3.82579 | 0        | 0        | 0        | 0        |
| WNT2B    | -2.3622  | 0        | 0        | 0        | -4.5358  |
| PARD6A   | 0        | 2.635301 | 0        | 0        | 5.863364 |
| CELSR2   | 4.09746  | 0        | 3.701377 | 0        | 0        |
| PSMD12   | 0        | 0        | -2.36553 | 0        | 0        |
| SULF1    | 0        | -2.23799 | -2.3108  | 4.836812 | -3.84404 |
| TRPM4    | 2.191288 | 1.804944 | 0        | 0        | 0        |
| CTNNBIP1 | 3.175764 | 0        | 2.489421 | 0        | 4.37156  |
| KLF4     | -4.05748 | 0        | 0        | -5.55662 | -6.85836 |
| SOX17    | 0        | -6.15503 | 0        | 0        | 0        |
| HBP1     | 0        | 0        | 0        | 0        | -3.92352 |
| FZD6     | 0        | -2.15041 | 0        | 0        | 0        |
| PDE6G    | 0        | 0        | 0        | 0        | 3.333578 |
| SFRP1    | 0        | 0        | 0        | -3.94856 | 0        |
| FGF8     | 0        | 0        | 0        | 0        | 4.648729 |
| PRICKLE2 | 0        | 0        | 0        | 0        | -3.3683  |
| PIAS4    | 0        | 0        | 0        | 0        | 3.457345 |
| MYOC     | -11.7551 | -3.66614 | -2.60433 | -12.2447 | -12.6236 |
| DIXDC1   | -2.9729  | 0        | -2.60599 | 0        | -4.76062 |
| ASPM     | 6.133352 | 0        | 0        | 4.575232 | 5.409098 |
| BCL9     | 0        | -2.2746  | 0        | 0        | 0        |
| STK11    | 0        | 0        | 0        | 0        | 3.496187 |
| GRK6     | 2.247842 | 0        | 2.55516  | 0        | 4.630793 |
| CPE      | -3.74187 | -4.56895 | 0        | 0        | -3.4578  |
| CTHRC1   | 0        | -2.43876 | 0        | 3.733465 | 0        |
| NR4A2    | -5.08336 | -4.66994 | 0        | -9.26053 | -9.42924 |
| GRHL3    | 3.335591 | 0        | 3.762522 | -4.47326 | 0        |



|         |          |          |          |          |          |
|---------|----------|----------|----------|----------|----------|
| EGR1    | -7.11579 | -2.94803 | 0        | -4.85668 | -9.15295 |
| EGF     | 2.570847 | 0        | 3.032097 | 0        | 0        |
| PPP2R1A | 0        | 0        | 0        | 0        | 3.681628 |
| CDC73   | 0        | 0        | -2.19064 | 0        | 0        |
| FZD1    | -2.45931 | 0        | 0        | 0        | -4.30458 |
| PSMB10  | 3.273024 | 0        | 2.432979 | 3.168493 | 3.073423 |
| DDIT3   | -5.10798 | -2.3419  | 0        | -2.87561 | -3.38352 |
| FOX L1  | 0        | -2.45934 | 0        | 0        | -3.7801  |
| KREMEN1 | 0        | 0        | 0        | 0        | -3.62708 |
| NFKB1   | 0        | -1.97001 | 0        | 0        | -4.82035 |
| LRP1    | -3.32579 | 0        | 0        | 0        | -4.14957 |
| CD24    | 5.714639 | -3.29942 | 0        | -3.05475 | 5.68427  |
| APC     | 0        | 0        | -2.28793 | 0        | 0        |
| RSP O1  | -4.02554 | 0        | 0        | 0        | -4.0698  |
| RARG    | 0        | 0        | 2.532582 | 0        | 0        |
| DVL2    | 0        | 0        | 0        | 0        | 3.282172 |
| NLE1    | 2.256862 | 0        | 0        | 0        | 5.186813 |
| TNRC6C  | -3.69215 | 0        | 0        | 0        | 0        |
| WNT5B   | 2.848565 | 0        | 0        | 3.582366 | 0        |
| WIF1    | -4.58262 | -3.17714 | 0        | 0        | 0        |
| TLE3    | 0        | 0        | 0        | -2.86358 | 0        |
| TLE2    | -3.90063 | 0        | 0        | -2.85914 | 0        |
| STK3    | 0        | 0        | -2.19043 | 0        | 0        |
| PSME4   | 0        | -2.09792 | 0        | 0        | -3.46479 |
| NFATC4  | -2.76936 | 0        | 0        | 0        | 0        |
| NFATC1  | -4.56311 | 0        | 0        | -3.15884 | 0        |
| WNT10A  | 3.673524 | 0        | 4.450882 | 0        | 0        |
| SOX10   | -3.27508 | -3.47425 | 0        | -3.45931 | 0        |
| MDFIC   | 0        | 0        | -2.24866 | 0        | -5.82661 |
| CCDC88C | 0        | -1.83703 | 0        | -5.81313 | 0        |
| CELSR1  | 3.761182 | 0        | 4.245726 | 0        | 0        |
| VPS26A  | 0        | 0        | -2.07267 | 0        | 0        |
| P2RX5   | 2.721445 | 0        | 0        | 3.014619 | 0        |
| GPC6    | -2.91287 | -4.20522 | -3.12343 | 0        | 0        |
| TSPAN12 | 0        | -2.60829 | 0        | -3.71885 | 0        |
| AXIN2   | -5.76546 | 0        | 0        | 0        | 0        |
| FERMT2  | -2.76481 | 0        | -2.58759 | 0        | 0        |
| KREMEN2 | 3.209791 | 0        | 0        | 0        | 5.056132 |
| SFRP2   | -7.74245 | -5.4964  | -2.59633 | -6.31747 | 0        |
| CDH2    | 0        | 0        | 0        | 3.043564 | 0        |
| CDH3    | 6.615209 | 0        | 4.704429 | 0        | 6.076329 |
| DRAXIN  | 0        | 0        | 0        | 0        | 6.992601 |

|         |          |          |          |          |          |
|---------|----------|----------|----------|----------|----------|
| PSMC6   | 0        | 0        | -2.09296 | 0        | 0        |
| FZD4    | -3.2931  | 0        | 0        | 0        | -3.0429  |
| FZD10   | -4.36757 | 0        | 0        | 0        | 0        |
| PDE6B   | 0        | 2.501113 | 0        | 0        | 4.211281 |
| PRKAA2  | 0        | 0        | 0        | -3.07973 | 0        |
| TLR2    | 0        | 0        | 0        | 0        | -5.67379 |
| ROR1    | 0        | -2.23853 | 0        | 2.76985  | 0        |
| PSMB5   | 2.945327 | 0        | 0        | 2.438757 | 3.393788 |
| SMO     | 0        | -2.3963  | 0        | 0        | 3.674392 |
| DRD2    | 0        | 3.442471 | 0        | 0        | 0        |
| WNT16   | -4.60017 | -2.18488 | 0        | -4.00975 | -5.09831 |
| DKK4    | 3.34473  | 0        | 4.119286 | 0        | 0        |
| HIC1    | 0        | 0        | 0        | 0        | -5.74552 |
| SNAI2   | 0        | 0        | 0        | 0        | -6.70694 |
| MLLT3   | 0        | -1.989   | -2.18898 | 0        | 0        |
| GPC4    | -3.54738 | 0        | 0        | -4.23619 | 0        |
| TGFB1I1 | 0        | 0        | 0        | 2.977089 | 0        |
| PYGO1   | -3.25998 | 0        | -2.59361 | 0        | -5.17901 |
| MAD2L2  | 0        | 0        | 0        | 0        | 5.320885 |
| CMAHP   | -4.6791  | 0        | 0        | 0        | 0        |
| LRP4    | 0        | 2.399472 | 0        | 0        | 0        |
| FZD7    | 0        | 1.895351 | 0        | 3.081614 | 3.632971 |
| RSPO4   | 0        | -4.91874 | 0        | 0        | -3.91532 |
